# Supplementary material
Source: Springer Nature journal article supplement (https://www.springermedizin.de/resource/supplementary/12936_2012_2652_MOESM2_ESM.pdf/9545038)

# Lactate clearance: proportion

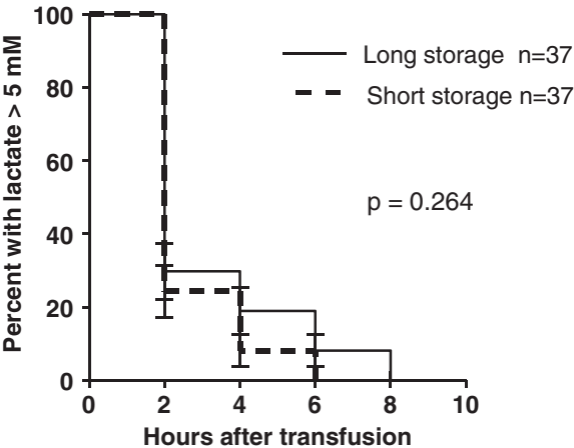

Supplement: MOESM2 [file 9545038]
